# Supplementary material
Source: publisher site journal article supplement (https://www.dovepress.com/article/609268)
Supplement: Supplementary file 1 [file 609268_Supplementalry%20files%20CLEAN.docx]

Table S1 Primer sequence information for in vivo experiments

| Gene | Gene ID | sequence 5'→3' |
| --- | --- | --- |
| *P85* | 18708 | F:CCCGTGCTTTTCAGATTTCCAG |
| R:TTGTTCATGCTGTTGTTGGCTAC |
| *AKT* | 11651 | F:AGAGGCAGGAAGAAGAGACGATGG |
| R:CACACGGTGCTTGGGCTTGG |
| *caspase-*9 | 12371 | F:ATGCTGTGTCAAGTTTGCCTACCC |
| R:CTGCTCCAGAATGCCATCCAAGG |
| *caspase-3* | 12367 | F:AGTGGGACTGATGAGGAGATGGC |
| R:ATGCTGCAAAGGGACTGGATGAAC |
| *PTEN* | 19211 | F:GACCCGTGGCACTGCTGTTTC |
| R:ACCTTTAGCTGGCAGACCACAAAC |
| *Bcl-2* | 12043 | F:TGATAACCGGGAGATCGTGATG |
| R:GAAGGAAGAAGATGCCAGGGGTG |
| *Bax* | 12028 | F:CAGGATGCGTCCACCAAGAAAGC |
| R:TGCCACCCGGAAGAAGACCTC |
| *COX-2* | 5912281 | F:GGCACACGGAAAGGAAACATAGGG |
| R:TCAACCTTGTCAACACAGCCTCAC |
| *VEGF* | 22339 | F:GAAGCTACTGCCGTCCGATTGAG |
| R:GCACTCCGAGGCTTCATCGTTAC |
| *GAPDH* | 14433 | F:GGTTGTCTCCTGCGACTTCA |
| R:TGGTCCAGGGTTTCTTACTCC |

Table S2 Primer sequence information for in vitro experiments

| Gene | Gene ID | sequence 5'→3' |
| --- | --- | --- |
| *P85* | 5295 | F:AGCAACCTGGCAGAATTACGACGA |
| R:AGGAGATAGCGTTTGAAAGCGTCAG |
| *AKT* | 207 | F:CAGGAGGAGGAGGAGATGGACTTC |
| R:CCCAGCAHCTTCAGGTACTCAAAC |
| *caspase-*9 | 842 | F:GACCAGAGATTCGCAAACCAGAGG |
| R:AAGAGCACCGACATCACCAAATCC |
| *caspase-3* | 836 | F:GGACTCTGGAATATCCCTGGACAAC |
| R:TGAGGTTTGCTGCATCGACATCTG |
| *PTEN* | 5728 | F:TTTGAAGACCATAACCCACCACAGC |
| R:CCAGTTCGTCCCTTTCCAGCTTTAC |
| *Bcl-2* | 596 | F:CAGCTGCACCTGACGCCCTTT |
| R:GCCTCCGTTATCCTGGATCC |
| *Bax* | 581 | F:CTCAGGATGCGTCCACCAAGAAG |
| R:GGCAAAGTAGAAAAGGGCGACAAC |
| *GAPDH* | 2597 | F: CAGGAGGCATTGCTGATGAT |
| R: GAAGGCTGGGGCTCATTT |

Table S3 Detailed information on proteins identified in the gel band of RJENs

| **Protein Accessions** | **Protein molecular weight [kDa]** | **Amino acid coverage [%]** | **Abundances** |
| --- | --- | --- | --- |
| Q17060 | 61.6 | 56 | 4088478074.25 |
| O18330 | 48.9 | 81 | 62937313046.9531 |
| H9KL77 | 11.4 | 17 | 1264422.125 |
| A0A7M7H4G6 | 29.5 | 3 | 1858043.5 |
| Q17061 | 52.9 | 29 | 22153898.625 |
| A0A7M6UQG5 | 5.8 | 12 | 520671968 |
| Q6IMJ9 | 50.5 | 53 | 1698648556.75 |
| Q4ZJX1 | 48.7 | 3 | 29747562 |
| A0A7M7LQ78 | 52.9 | 4 | 6457387 |
| O77061 | 51.0 | 63 | 7297357856 |
| A0A7M6UUY1 | 24.8 | 4 | 1146298.25 |
| O97432 | 70.2 | 22 | 30170559 |
| A0A7M7MM52 | 72.2 | 3 | 3544396.75 |
| A0A7M7LKA7 | 13.7 | 16 | 35444216 |
| Q9U8X6 | 67.9 | 9 | 5002517 |

Table S4 The top 10 bacterial strains in terms of relative abundance at the family level

| Taxonomy | Muribaculaceae | Lactobacillaceae | Bacteroidaceae | Lachnospiraceae | Rikenellaceae | Staphylococcaceae | Helicobacteraceae | Prevotellaceae | Tannerellaceae | Erysipelotrichaceae | Others |
| --- | --- | --- | --- | --- | --- | --- | --- | --- | --- | --- | --- |
| NC | 0.452767 | 0.092186 | 0.162684 | 0.094991 | 0.068552 | 0.000199 | 0.003756 | 0.012154 | 0.020737 | 0.007817 | 0.091974 |
| MC | 0.439967 | 0.061027 | 0.053501 | 0.170352 | 0.11078 | 0.000121 | 0.007021 | 0.003152 | 0.008633 | 0.002235 | 0.145446 |
| PC | 0.386463 | 0.10858 | 0.203054 | 0.10341 | 0.076394 | 0.000989 | 0.003115 | 0.015956 | 0.007092 | 0.004975 | 0.094947 |
| RJ | 0.33863 | 0.242787 | 0.030833 | 0.158012 | 0.060537 | 0.001683 | 0.003749 | 0.013418 | 0.006091 | 0.014916 | 0.14426 |
| RJE | 0.579436 | 0.073607 | 0.090738 | 0.074026 | 0.054062 | 0.000064 | 0.001115 | 0.018537 | 0.016528 | 0.010275 | 0.091887 |


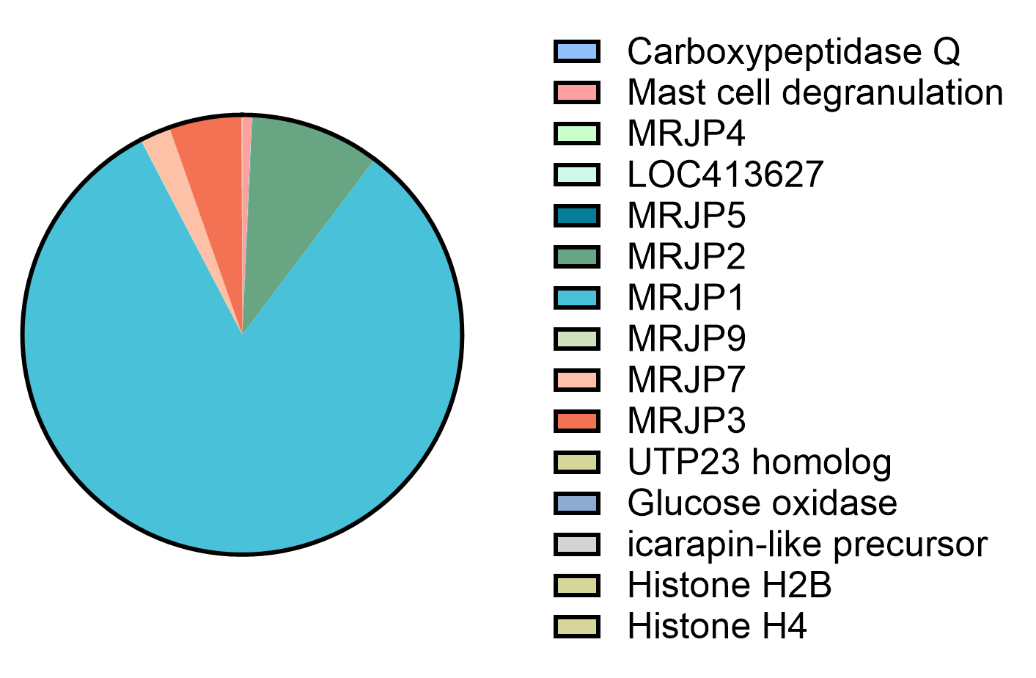


Figure S1 The types and proportions of proteins in the gel band.


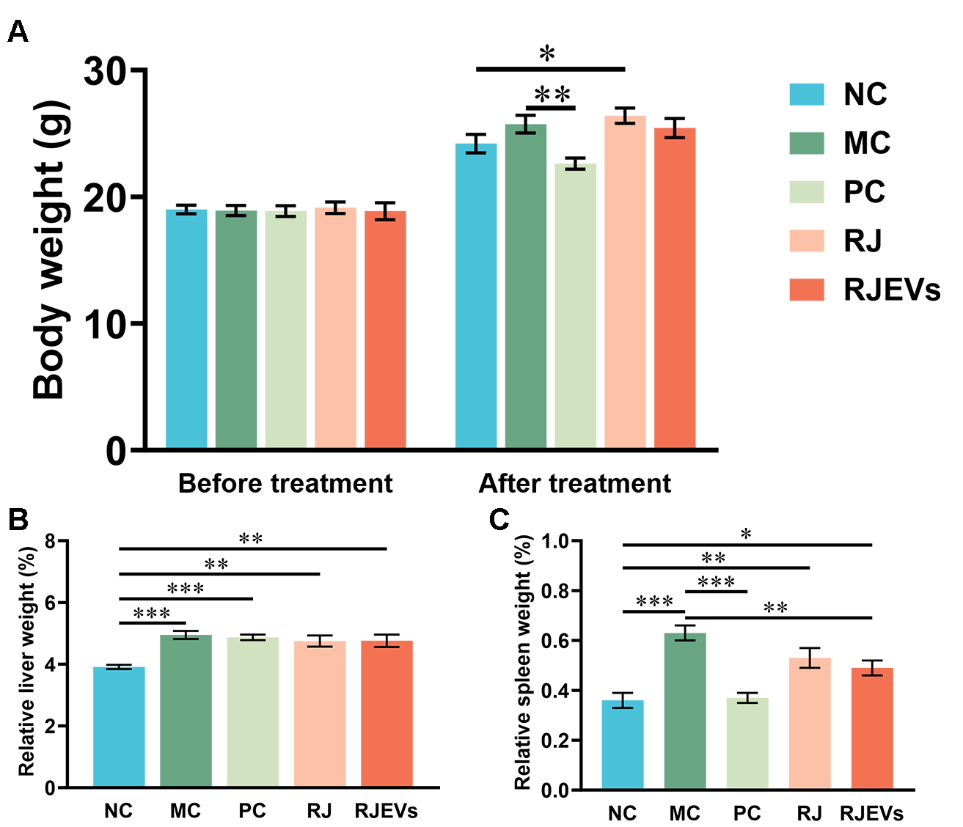


Figure S2 Effects of different treatments on body weight and liver/spleen indices in mice. Data were presented as mean ± SEM (n = 6); *p < 0.05, **p < 0.01, ***p < 0.001.


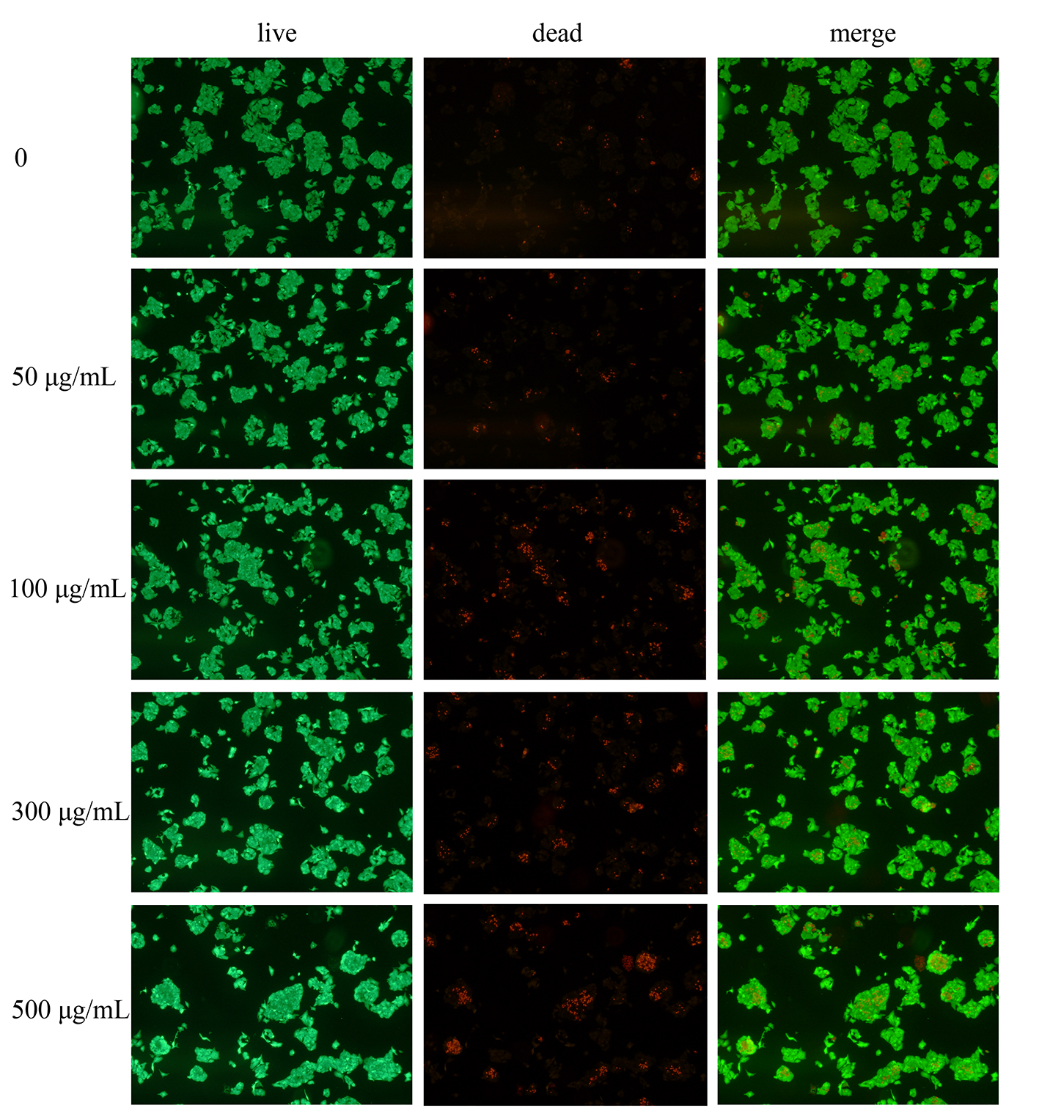


Figure S3 Live-dead cell Staining of HepG2 cells treated with RJEVs at different concentrations.
